# Supplementary material for: Human neutralising antibodies elicited by SARS‐CoV‐2 non‐D614G variants offer cross‐protection against the SARS‐CoV‐2 D614G variant
Source: PubMed Central journal article supplement — Clin Transl Immunology. 2021 Feb 22;10(2):e1241. doi: 10.1002/cti2.1241 (PMC7899292; doi:10.1002/cti2.1241), 2021-02-22
Supplement: CTI2-10-e1241-s001.pdf [file CTI2-10-e1241-s001.pdf]

**(a)**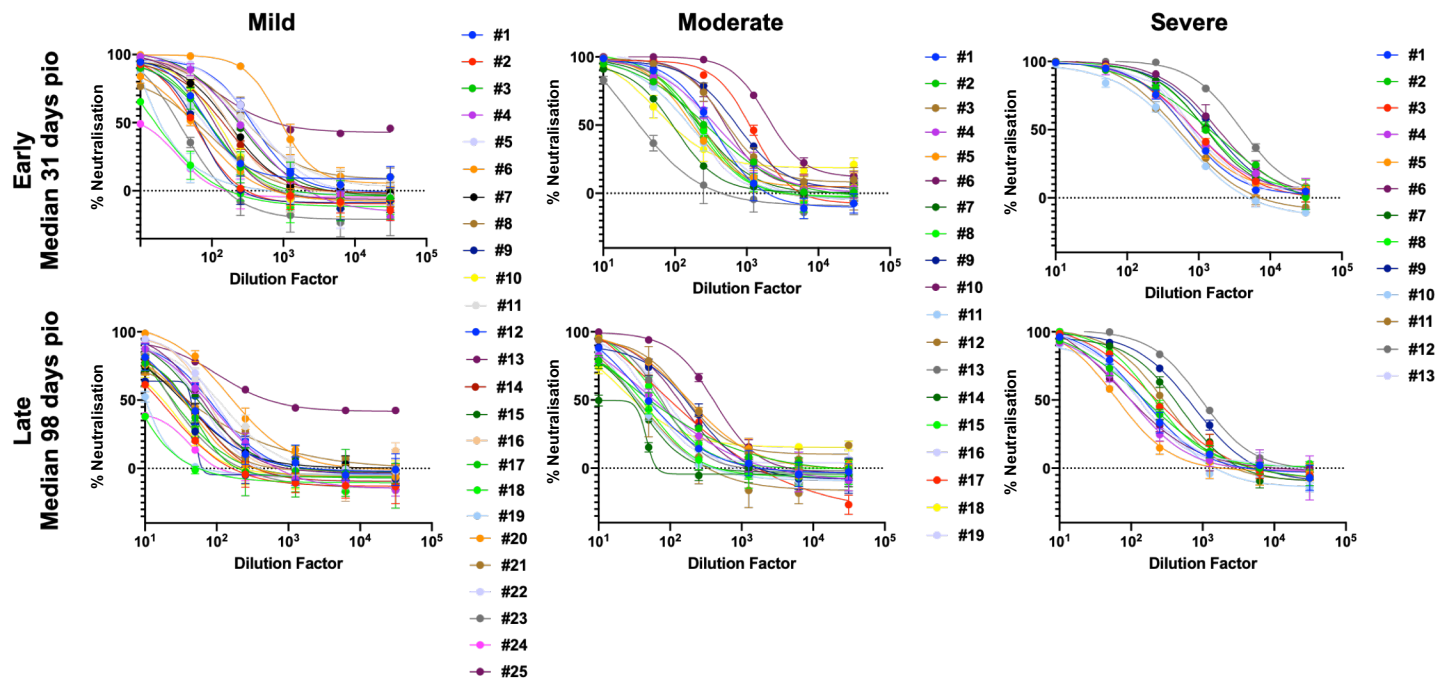**(b)**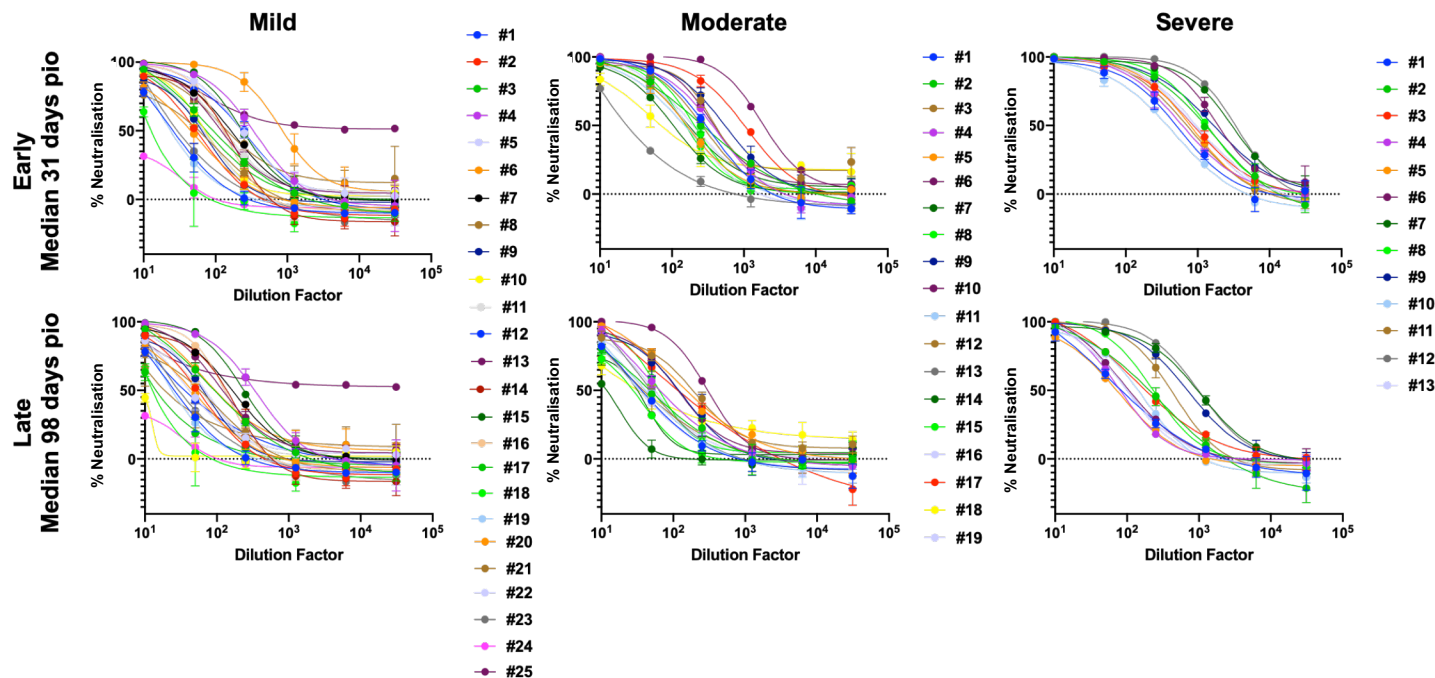

**Supplementary Figure 1. COVID-19 patient plasma neutralises both SARS-CoV-2 D614 and G614 pseudoviruses.** Plasma samples of mild (n=25), moderate (n=19), and severe (n=13) COVID-19 patients at median 31 and 98 days post-illness onset (pio) were incubated with luciferase expressing lentiviruses pseudotyped with SARS-CoV-2 D614 or G614 spike (S) glycoprotein protein for 1 hour prior to infection of CHO-ACE2 cells for 48 hours. Infection levels were determined by luciferase assay, and percentage of neutralisation is presented. Dose-response neutralisation titration curves against (a) D614 and (b) G614 pseudoviruses at 1:10 to 1:31250 dilutions. Lines represent non-linear regression robust fit and data are shown as mean  $\pm$  SEM of two independent experiments.

(a)

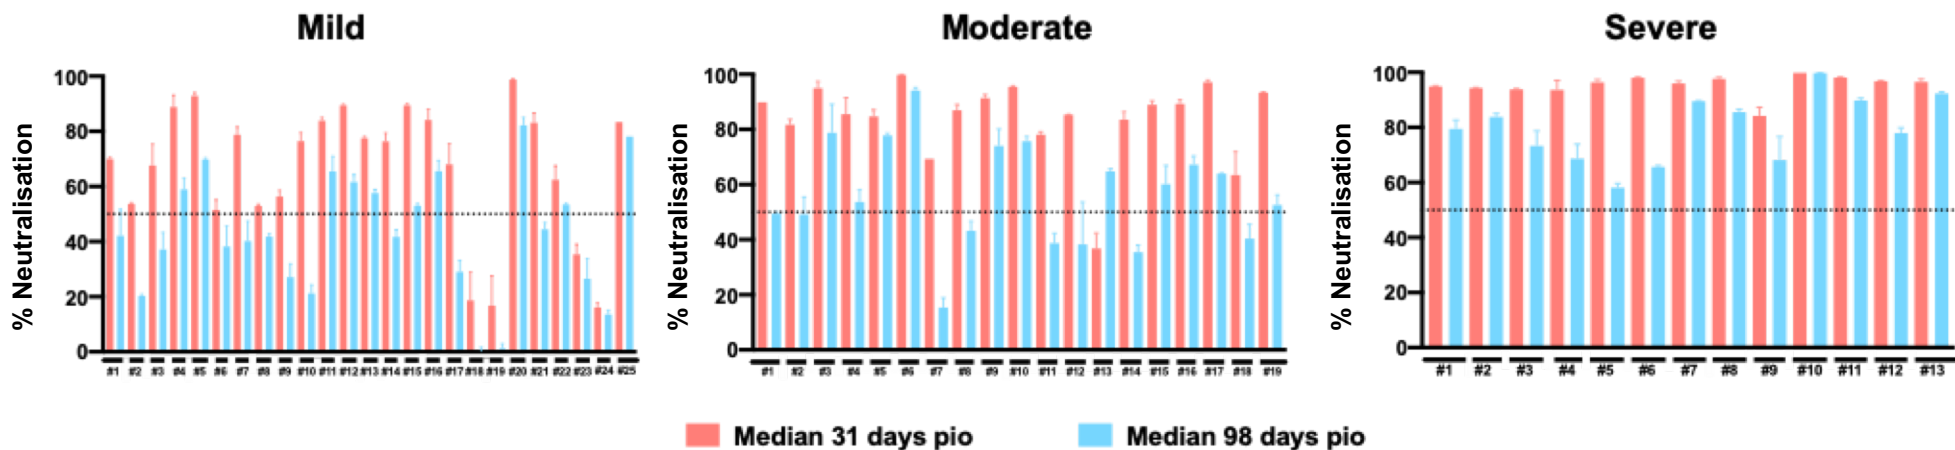

(b)

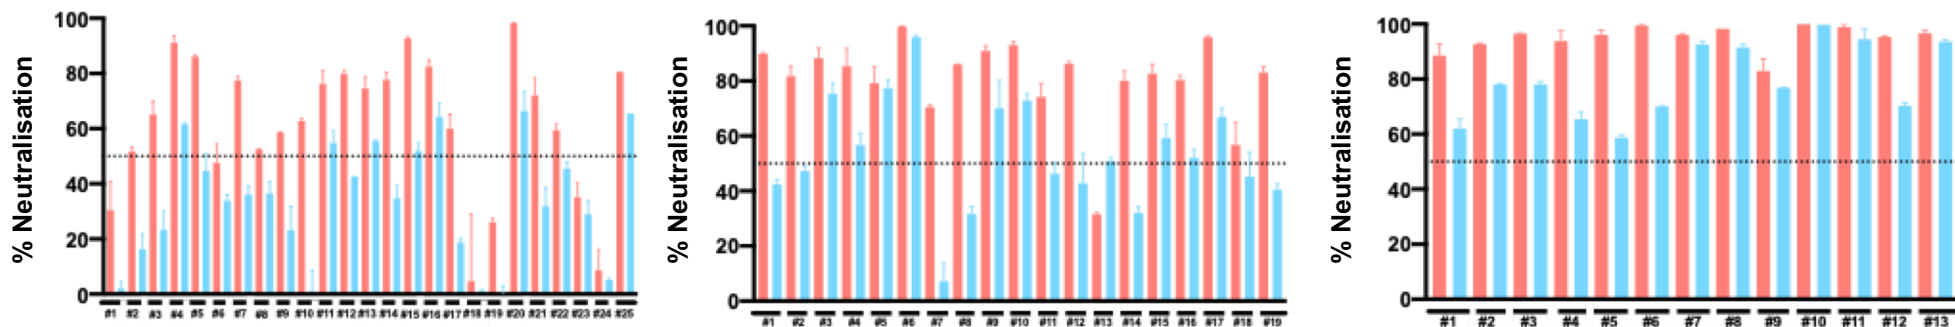

**Supplementary Figure 2. COVID-19 patient plasma neutralises both SARS-CoV-2 D614 and G614 pseudoviruses.** Plasma samples of mild (n=25), moderate (n=19), and severe (n=13) COVID-19 patients at median 31 and 98 days post-illness onset (pio) were incubated at 1:50 dilution with luciferase expressing lentiviruses pseudotyped with SARS-CoV-2 (a) D614 or (b) G614 spike (S) glycoprotein protein for 1 hour prior to infection of CHO-ACE2 cells for 48 hours. Infection levels were determined by luciferase assay, and percentage of neutralisation is presented. Data are shown as mean  $\pm$  SEM of two independent experiments. Dotted line indicates 50% neutralisation.
